# Supplementary material for: Impact of Venoarterial Extracorporeal Membrane Oxygenation on Alkaline Phosphatase Metabolism after Cardiac Surgery
Source: MDPI journal article supplement (doi:10.3390/biom11050748), 2021-05-17
Supplement: s1 [file s1]

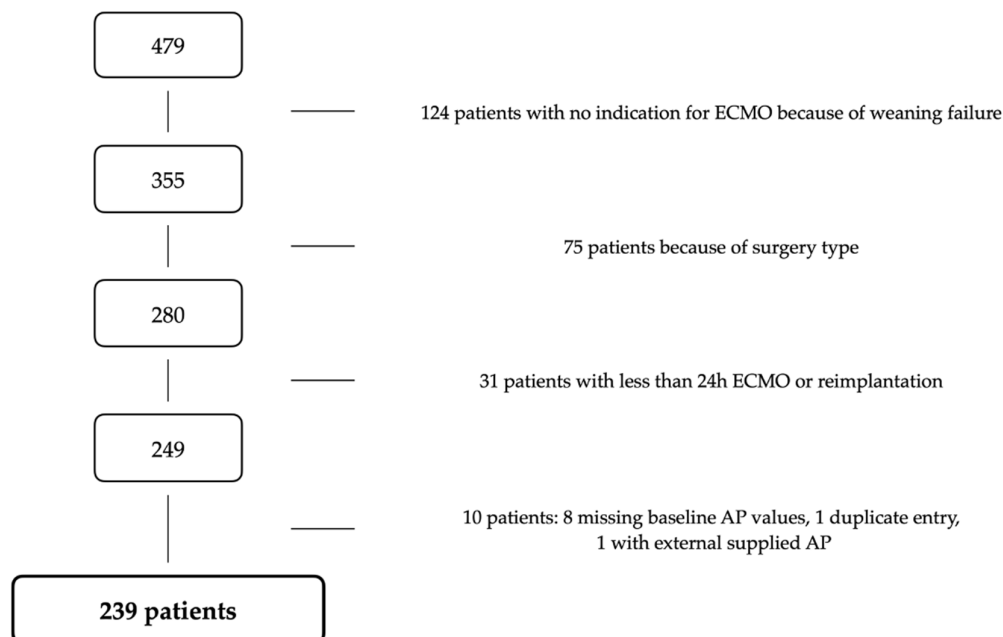

2

**Figure S1.** Flow chart for patient selection. For analysis purposes a total of 479 patients were screened from the local ECMO registry. 124 patients were excluded due to a VA-ECMO indication other than CPB weaning failure. These patients received VA-ECMO during the postoperative course because of hemodynamic decline, cardiopulmonary resuscitation, and/or respiratory failure after cardiac surgery within 30 days after surgery. 75 patients were excluded because of surgery - 61 patients who receiving a heart transplant and 14 patients with an unspecified intervention, ranging from a combined heart-lung transplantation, aortic annulus rupture after transcatheter aortic valve implantation, mediastinal cyst removal to ischemic ventricular septal defect. 16 patients who required VA-ECMO support for less than 24h and 15 patients who were in need of VA-ECMO re-implantation were excluded. A further 8 patients with missing baseline AP levels were excluded. One patient who participated at a study involving bovine alkaline phosphatase submission was excluded. One duplicate entry was excluded. Two-hundred-thirty-nine (239) patients entered the retrospective data analysis after reviewing the exclusion criteria.

3  
4  
5  
6  
7  
8  
9  
10  
11  
12  
13

14

Table S1. Supplementary data for the laboratory parameters.

|                                   | Overall<br><i>n</i> =239 | ECMO<br>< 5 days<br><i>n</i> =120 | ECMO<br>≥ 5 days<br><i>n</i> =119 | <i>p</i> -value <sup>a</sup> | AP drop<br>< 60%<br><i>n</i> =110 | AP drop<br>≥ 60%<br><i>n</i> =105 | <i>p</i> -value <sup>a</sup> |
|-----------------------------------|--------------------------|-----------------------------------|-----------------------------------|------------------------------|-----------------------------------|-----------------------------------|------------------------------|
| Baseline AP within POD 5          | 106 (44.4)               | 50 (41.7)                         | 56 (47.1)                         | 0.401                        | 69 (62.7)                         | 30 (28.6)                         | 0.000*                       |
| Baseline AP within POD 7          | 154 (64.4)               | 72 (60.0)                         | 82 (68.9)                         | 0.150                        | 89 (80.9)                         | 52 (49.5)                         | 0.000*                       |
| Baseline AP within POD 30         | 193 (80.8)               | 92 (76.7)                         | 101 (84.9)                        | 0.108                        | 96 (87.3)                         | 81 (77.1)                         | 0.052                        |
| Death before Baseline AP achieved | 39 (16.3)                | 23 (19.2)                         | 16 (13.4)                         | 0.231                        | 12 (10.9)                         | 19 (18.1)                         | 0.134                        |
| Drop of AP (POD1)                 | 0.59 (0.69, 0.46)        | 0.56 (0.68, 0.46)                 | 0.61 (0.69, 0.49)                 | 0.166                        | 0.47 (0.54, 0.40)                 | 0.69 (0.75, 0.65)                 | 0.000*                       |
| AP baseline                       | 80 (107, 61)             | 81 (106, 61)                      | 80 (108, 60)                      | 0.927                        | 68 (83, 55)                       | 99 (130, 76)                      | 0.000*                       |
| CRP baseline                      | 1.0 (3.9, 0.3)           | 1.0 (3.8, 0.3)                    | 1.1 (4.0, 0.3)                    | 0.821                        | 1.0 (4.8, 0.3)                    | 0.9 (2.9, 0.4)                    | 0.582                        |
| Creatinine level baseline         | 1.23 (1.68, 1.00)        | 1.23 (1.61, 1.02)                 | 1.23 (1.75, 0.98)                 | 0.958                        | 1.20 (1.64, 0.97)                 | 1.22 (1.69, 1.00)                 | 0.589                        |
| eGFR                              | 60.1 (83.5, 41.8)        | 60.1 (83.0, 40.0)                 | 60.1 (83.5, 41.9)                 | 0.922                        | 63.7 (85.8, 45.3)                 | 55.5 (74.8, 38.4)                 | 0.033*                       |
| AP POD 1                          | 34 (44, 27)              | 34 (44, 28)                       | 33 (41, 26)                       | 0.306                        | 36 (46, 29)                       | 30 (40, 22)                       | 0.000*                       |
| CRP POD 1                         | 5.5 (8.7, 3.6)           | 6.0 (9.5, 3.7)                    | 5.3 (7.9, 3.4)                    | 0.118                        | 6.8 (10.5, 4.4)                   | 4.9 (7.4, 3.4)                    | 0.000*                       |
| Creatinine level POD 1            | 1.33 (1.73, 1.02)        | 1.35 (1.71, 1.00)                 | 1.32 (1.75, 1.04)                 | 0.921                        | 1.29 (1.68, 0.98)                 | 1.31 (1.65, 1.01)                 | 0.952                        |
| AP POD 5                          | 77 (112, 62)             | 82 (109, 65)                      | 76 (116, 58)                      | 0.319                        | 77 (109, 64)                      | 81 (119, 59)                      | 0.610                        |
| CRP POD 5                         | 14.7 (22.9, 8.0)         | 15.7 (23.8, 8.4)                  | 14.3 (22.6, 7.8)                  | 0.667                        | 17.2 (23.5, 8.8)                  | 12.5 (22.6, 7.2)                  | 0.110                        |
| Creatinine level POD 5            | 1.41 (1.95, 1.03)        | 1.36 (1.85, 1.01)                 | 1.53 (2.10, 1.07)                 | 0.137                        | 1.36 (1.91, 1.02)                 | 1.43 (1.94, 1.05)                 | 0.507                        |
| AP POD 7                          | 103 (151, 74)            | 97 (150, 77)                      | 105 (155, 72)                     | 0.892                        | 100 (149, 71)                     | 102 (158, 75)                     | 0.676                        |
| CRP POD 7                         | 13.5 (19.1, 8.2)         | 12.7 (17.1, 8.2)                  | 14.8 (20.4, 7.7)                  | 0.330                        | 13.9 (19.3, 8.1)                  | 13.5 (19.3, 8.7)                  | 0.491                        |
| Creatinine level POD 7            | 1.39 (1.91, 1.00)        | 1.31 (1.76, 0.99)                 | 1.49 (2.03, 1.00)                 | 0.205                        | 1.20 (1.76, 0.95)                 | 1.48 (1.89, 1.02)                 | 0.243                        |
| AP POD 30                         | 143 (211, 102)           | 136 (198, 100)                    | 148 (221, 119)                    | 0.133                        | 126 (185, 94)                     | 167 (262, 126)                    | 0.001*                       |
| CRP POD 30                        | 4.8 (9.3, 2.4)           | 4.2 (9.3, 2.4)                    | 5.3 (9.5, 2.5)                    | 0.770                        | 4.2 (7.3, 2.5)                    | 5.5 (10.0, 2.4)                   | 0.362                        |
| Creatinine level POD 30           | 1.01 (1.54, 0.70)        | 1.02 (1.47, 0.70)                 | 1.00 (1.83, 0.69)                 | 0.894                        | 0.99 (1.63, 0.68)                 | 1.00 (1.43, 0.70)                 | 0.829                        |

All values are referred in median (Q3, Q1) or in total number (*n*) and percentage (%) | <sup>a</sup> If not stated otherwise, Mann-Whitney-U-Test and Pearson's chi-squared test, respectively, were used; values marked with an asterisk (\*) achieved statistical significance | Reference range for alkaline phosphatase 40-130 U/L, CRP < 0.5 mg/dL and creatinine 0.7 – 1.2 mg/dL | eGFR = estimated glomerular filtration rate calculated by the Cockcroft-Gault formula.

Table S2. Supplementary data of the index procedure.

| Index procedure             | Overall<br><i>n</i> =239 | ECMO<br>< 5days<br><i>n</i> =120 | ECMO<br>≥ 5 days<br><i>n</i> =119 | <i>p</i> -value <sup>a</sup> | AP drop<br>< 60%<br><i>n</i> =110 | AP drop<br>≥ 60%<br><i>n</i> =105 | <i>p</i> -value <sup>a</sup> |
|-----------------------------|--------------------------|----------------------------------|-----------------------------------|------------------------------|-----------------------------------|-----------------------------------|------------------------------|
| ... CABG                    | 34 (14.2)                | 19 (15.8)                        | 15 (12.6)                         | 0.475                        | 18 (16.4)                         | 11 (10.5)                         | 0.207                        |
| ... CABG +<br>Valve Surgery | 72 (30.1)                | 36 (30.0)                        | 36 (30.3)                         | 0.966                        | 27 (24.5)                         | 40 (38.1)                         | 0.032*                       |
| ... Valve Surgery           | 74 (31.0)                | 37 (30.8)                        | 37 (31.1)                         | 0.965                        | 33 (30.0)                         | 35 (33.3)                         | 0.599                        |
| ... Aortic Aneurysm         | 9 (3.8)                  | 4 (3.3)                          | 5 (4.2)                           | 0.749 <sup>o</sup>           | 6 (5.5)                           | 1 (1.0)                           | 0.120 <sup>o</sup>           |
| ... Aortic Dissection       | 21 (8.8)                 | 7 (5.8)                          | 14 (11.8)                         | 0.105                        | 11 (10.0)                         | 8 (7.6)                           | 0.539                        |
| ... Congenital              | 3 (1.3)                  | 1 (0.8)                          | 2 (1.7)                           | 0.622 <sup>o</sup>           | 2 (1.8)                           | 1 (1.0)                           | 1.000 <sup>o</sup>           |
| ... Endocarditis            | 26 (10.9)                | 16 (13.3)                        | 10 (8.4)                          | 0.221                        | 13 (11.8)                         | 9 (8.6)                           | 0.432                        |

All values are referred in total number (*n*) and percentage (%) | <sup>a</sup> *p*-values calculated with Pearson's chi-squared test if not stated otherwise; values marked with an asterisk (\*) achieved statistical significance | <sup>o</sup> *p* values calculated by Fisher Exact Test | CABG – coronary aortic bypass grafting.

21

22

23

24

25

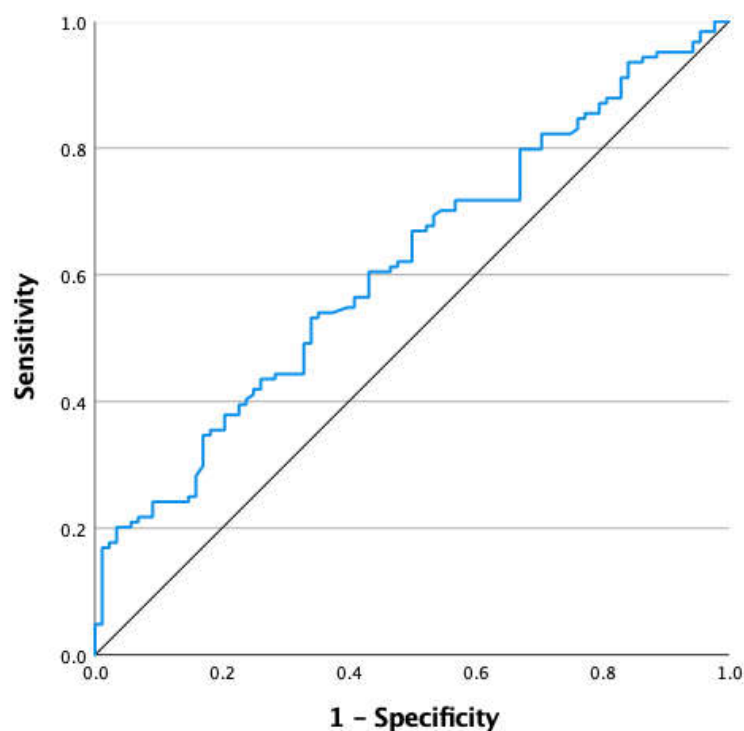

Figure S2. ROC analysis for AP drop and 1-year mortality.

Table S3. Sensitivity and Specificity of different AP drops values according to the AUC analysis. The cut-off of 60% demonstrated a balanced relation between sensitivity and specificity.

| AP drop ... | Sensitivity  | Specificity  |
|-------------|--------------|--------------|
| 30%         | 95.2%        | 8%           |
| 40%         | 88.7%        | 17.0%        |
| 50%         | 71.8%        | 36.4%        |
| <b>60%</b>  | <b>54.0%</b> | <b>62.5%</b> |
| 70%         | 25.0%        | 85.2%        |
| 80%         | 8.1%         | 98.9%        |
